# Supplementary material for: Iron overload-induced ferroptosis of osteoblasts as a potential therapeutic target for osteoporosis
Source: Research Square preprint supplement (doi:10.21203/rs.3.rs-6072367/v1), 2025-04-19
Supplement: Supplementary file 1 [file 6843e724eabb4f1a457f3a95.docx]

**Original western blots**

**1. Original western bolts of Figure 2h**


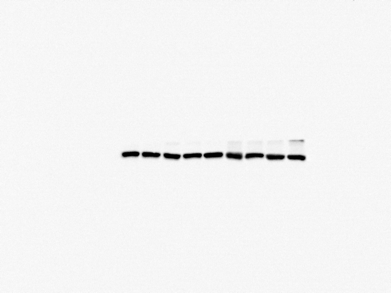

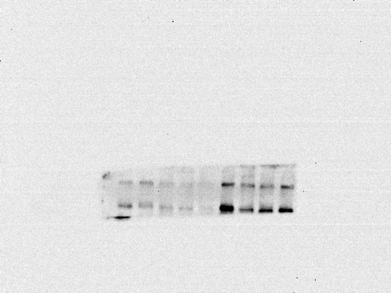


RFeD

SD

RFeD

SD

NFATc1 90-140kDa

β-actin 42kDa

**2. Original western bolts of Figure 2j**


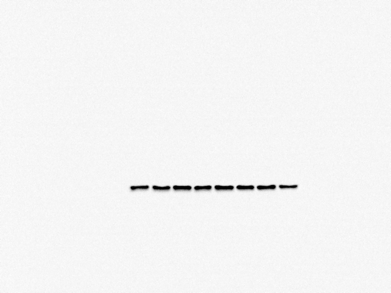

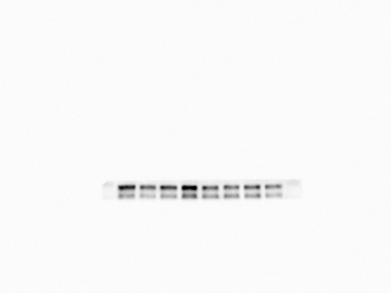


RFeD

SD

SD

RFeD

RUNX2 55-62kDa

β-actin 42kDa

**3. Original western bolts of Figure 3j**


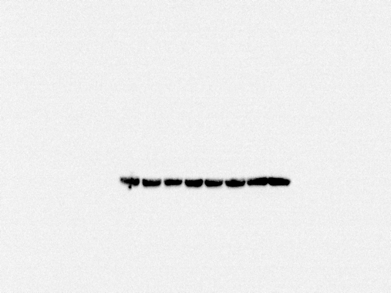

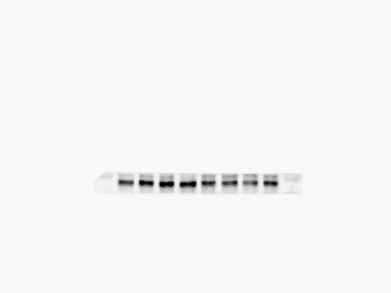


RFeD

SD

RFeD

SD

GPX4 20-23kDa

β-actin 42kDa

**4. Original western bolts of Figure 4g**


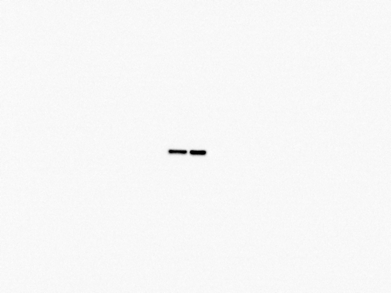

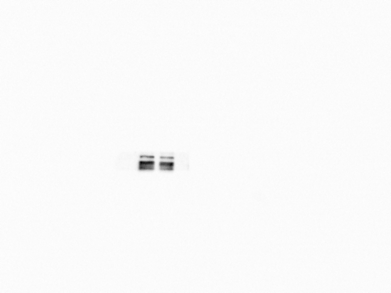


0/20mM

0/20mM

RUNX2 55-62kDa

GAPDH 36kDa

**5. Original western bolts of Figure 4i**


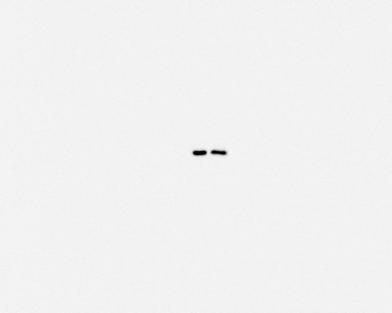

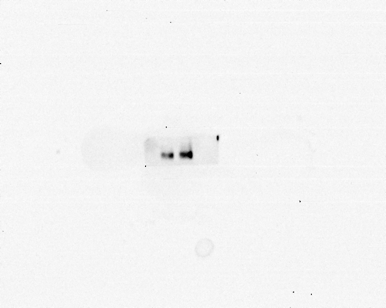


0/5mM

0/5mM

NFATc1 90-140kDa

GAPDH 36kDa

**6. Original western bolts of Figure 5f**


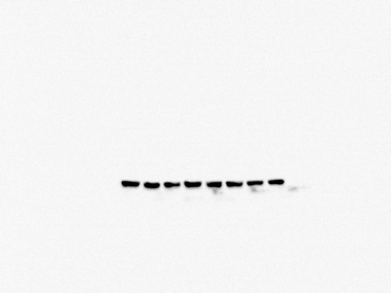

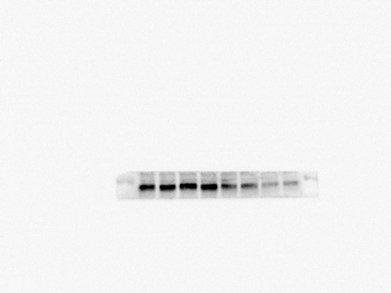


20mM

0mM

GPX4 20-23kDa

β-actin 42kDa

20mM

0mM

0mM

20mM

0mM

20mM
